# Supplementary material for: Canine SOD1 harboring E40K or T18S mutations promotes protein aggregation without reducing the global structural stability
Source: PeerJ. 2020 Jul 15;8:e9512. doi: 10.7717/peerj.9512 (PMC7368427; doi:10.7717/peerj.9512)
Supplement: Data S1 [file peerj-08-9512-s001.xlsx]

## Sheet: raw data
SOD activity
	Absorbance
dilution ratio	Apo-SOD1 WT			Apo-SOD1 E40K			Apo-SOD1 T18S
1	0.0426667	0.046	0.0546667	0.045	0.0413333	0.0596667	0.061	0.0505	0.059
0.2	0.0753333	0.081	0.111	0.05	0.0503333	0.116333	0.188333	0.121	0.108333
0.04	0.198667	0.228	0.244333	0.131	0.114333	0.244667	0.237333	0.2415	0.242
0.008	0.276667	0.277333	0.322333	0.196	0.208333	0.295333	0.283333	0.3195	0.305
0.0016	0.287667	0.284	0.278333	0.274667	0.26	0.362667	0.315667	0.3015	0.320667
0.00032	0.326	0.308667	0.269333	0.284667	0.31	0.338333	0.296667	0.2785	0.312333
6.4e-05	0.296333	0.335333	0.334333	0.297333	0.288	0.318	0.330333	0.304	0.314333
dilution ratio	Holo-SOD1 WT			Holo-SOD1 E40K			Holo-SOD1 T18S
1	0.0393333	0.0453333	0.042	0.041	0.0383333	0.045	0.0393333	0.0356667	0.036
0.2	0.039	0.0483333	0.044	0.044	0.0386667	0.0613333	0.038	0.0346667	0.0553333
0.04	0.0393333	0.0546667	0.043	0.0436667	0.0393333	0.0723333	0.0393333	0.0356667	0.115667
0.008	0.067	0.092	0.059	0.07	0.0526667	0.120333	0.0723333	0.046	0.229
0.0016	0.154	0.191	0.1035	0.193333	0.155333	0.221	0.166	0.147667	0.241
0.00032	0.214333	0.257	0.195	0.223333	0.257	0.278	0.228	0.190667	0.26
6.4e-05	0.264667	0.276333	0.3135	0.293667	0.286	0.303	0.308	0.248667	0.284
