# Supplementary material for: Canine SOD1 harboring E40K or T18S mutations promotes protein aggregation without reducing the global structural stability
Source: PeerJ. 2020 Jul 15;8:e9512. doi: 10.7717/peerj.9512 (PMC7368427; doi:10.7717/peerj.9512)
Supplement: Data S2 [file peerj-08-9512-s002.xlsx]

## Sheet: Apo-SOD1
Thioflavin-T
Time	Apo-WT								Time	Apo-E40K												Time	Apo-T18S
0	352.921	359.309	474.383	476.446	476.241	944	930	886	0	341.248	363.507	957	897	940	334.933	334.805	458.006	477.12	447.275	530.892	504.332	0	582.509	584.49	939	978	964	496.81	491.372	497.341	537.195	510.768	473.454	422.223
15.3026	352.079	367.514	464.709	464.513	465.586	963	944	889	15.3026	389.687	347.271	1015	953	1006	444.396	500.354	456.704	473.955	446.64	530.118	484.686	15.3026	576.239	581.858	914	980	959	471.199	470.657	471.407	540.823	531.439	486.039	437.107
30.6052	357.503	373.506	460.854	463.124	454.64	947	940	893	30.6052	816.004	599.767	1139	1156	1203	836.883	878.284	719.94	752.122	742.82	713.289	635.107	30.6052	584.074	592.158	933	972	958	465.499	464.819	468.903	545.233	546.678	740.426	623.596
45.9069	364.817	378.03	468.836	468.19	455.894	956	950	901	45.9069	1035.17	911.271	1302	1416	1459	1031.37	1061.57	1110.19	1146.34	1145.18	1119.51	1067.13	45.9069	585.882	595.782	918	986	954	470.601	471.152	470.731	612.902	612.12	1321.66	1154.12
61.2095	377.232	380.548	469.775	467.561	455.221	965	946	898	61.2095	1147.42	1073.8	1455	1660	1681	1141.9	1172.03	1362.03	1409.4	1399.13	1390.57	1385.87	61.2095	593.828	601.634	927	982	964	470.22	468.843	476.345	733.032	751.738	1747.52	1561.58
76.5117	391.904	382.65	474.516	472.535	457.894	962	938	903	76.5117	1221.65	1166.96	1601	1849	1872	1208.45	1247.04	1518.69	1584.18	1559.79	1557.68	1592.69	76.5117	599.042	611.679	942	990	963	474.414	475.444	476.636	843.82	887.719	2024.26	1799.02
91.8144	409.879	383.077	467.036	464.845	459.268	951	939	892	91.8144	1283.94	1235.26	1726	2026	2026	1267.62	1308.77	1646.59	1704.88	1676.74	1694.25	1706.87	91.8144	606.042	624.785	931	987	968	472.801	473.384	475.444	952.533	1011.51	2214.93	1951.94
107.116	425.141	383.225	470.35	471.35	461.162	956	936	902	107.116	1338.15	1277.9	1846	2168	2182	1311.64	1348.23	1737.83	1820.12	1802.8	1778.69	1810.68	107.116	621.664	650.595	935	984	965	476.746	477.937	481.183	1043.95	1125.6	2341.33	2070.19
122.419	449.958	386.058	470.904	473.727	463.481	953	945	898	122.419	1382.91	1320.53	1915	2331	2328	1349.04	1384.31	1827.94	1911.47	1885.54	1832.75	1884.2	122.419	642.592	681.194	931	994	974	479.037	478.068	486.881	1132.29	1228.36	2465.18	2159.47
137.722	466.976	384.789	470.69	472.009	464.399	949	944	909	137.722	1420.82	1346.66	1984	2416	2424	1373.35	1408.24	1902.26	1972.42	1958.36	1900.3	1939.79	137.722	667.406	710.205	933	999	971	475.744	480.285	495.334	1201.14	1310.54	2551.3	2235.46
153.023	488.964	386.095	471.353	472.472	469.323	954	945	903	153.023	1461.57	1380.61	2065	2500	2500	1408.3	1442.74	1952.42	2025.4	2011.75	1914.06	1983.64	153.023	691.56	743.728	938	1000	977	480.341	484.104	493.308	1266.42	1374.2	2628.27	2296.04
168.325	505.447	381.29	468.931	470.765	466.293	948	942	907	168.325	1501.01	1409.93	2153	2603	2569	1444.7	1474.58	1996.24	2072.53	2060.57	1949.83	2026.39	168.325	715.322	775.958	940	1011	975	482.043	482.616	493.664	1317.08	1435.29	2681.82	2334.42
183.627	533.005	381.887	474.783	477.223	468.853	952	935	897	183.627	1532.7	1432.98	2200	2678	2685	1467.73	1496.44	2041.27	2112.94	2103.51	1985.99	2063.67	183.627	746.138	813.701	944	1019	982	488.351	488.705	500.39	1361.41	1484.44	2741.67	2387.57
198.93	559.023	383.599	468.729	470.632	463.256	957	945	890	198.93	1563.45	1458.79	2250	2754	2748	1492.4	1521.09	2065.18	2136.82	2137.77	2027.62	2097.12	198.93	773.864	850.963	935	1017	982	484.688	489.163	501.64	1412.98	1532.62	2772.89	2420.64
214.233	579.923	382.863	472.002	473.766	465.802	945	947	897	214.233	1594.41	1481.39	2290	2789	2807	1512.35	1539.15	2093.6	2170.58	2170.87	2053.34	2122.13	214.233	804.459	886.225	948	1020	987	482.215	485.581	501.961	1444.74	1574.22	2813.33	2451
229.535	595.051	384.878	468.23	470.917	466.253	948	938	904	229.535	1621.6	1505.97	2333	2861	2860	1538.06	1559.87	2125.97	2199.16	2203.69	2086.03	2152.36	229.535	834.746	923.293	958	1018	1000	488.167	492.076	503.734	1481.24	1610.34	2858.22	2489.46
244.838	610.52	380.827	475.987	476.479	467.806	952	950	901	244.838	1648.36	1529.3	2382	2917	2912	1561.44	1581.72	2153.26	2226.48	2232.59	2103.21	2169.12	244.838	863.719	957.575	953	1026	991	492.228	493.652	504.603	1508.23	1640.93	2891.33	2510.15
260.141	625.395	382.278	469.673	471.446	468.813	950	937	904	260.141	1675.13	1551.78	2419	2939	2955	1575.51	1596.63	2166.51	2248.16	2248.46	2132.21	2196.48	260.141	894.065	995.251	953	1031	995	491.717	491.889	503.737	1546.17	1679.56	2920.14	2545.25
275.443	640.22	385.093	466.35	470.595	461.692	949	935	906	275.443	1699.61	1577.86	2465	3009	2984	1598.58	1616.25	2170.33	2263.06	2263.16	2143.41	2213.02	275.443	922.306	1031.11	974	1037	1008	491.144	490.75	500.22	1567.51	1701.26	2943.32	2561.4
290.746	646.182	384.403	468.71	468.755	461.734	943	943	898	290.746	1721.9	1602.06	2471	3030	3030	1617	1635.86	2194.72	2282.79	2285.57	2156.04	2222.19	290.746	950.568	1061.45	975	1044	1014	489.727	493.386	502.694	1587.65	1721.91	2975.64	2582.27
306.047	653.542	382.614	470.77	469.687	467.218	947	944	896	306.047	1746.21	1622.11	2514	3043	3050	1635.41	1650.51	2209.93	2299.62	2304.22	2170.95	2244.47	306.047	980.009	1099.34	959	1048	1009	489.619	494.427	502.211	1613.12	1751.01	2984.18	2594.65
321.35	663.869	382.375	472.455	472.187	467.236	949	938	890	321.35	1766.7	1644.42	2515	3074	3081	1650.72	1665.55	2216.21	2312.07	2320.06	2189.24	2256.63	321.35	1011.13	1132.64	975	1060	1020	495.266	503.283	506.299	1635.04	1767.97	3006.86	2612
336.652	679.409	382.916	469.914	472.35	464.683	950	943	900	336.652	1796.23	1667.93	2541	3103	3140	1669.44	1680.26	2229.61	2315.34	2333.92	2202.17	2276.02	336.652	1038.54	1164.69	977	1054	1014	497.508	500.309	505.59	1654.25	1793.78	3028.48	2632.97
351.955	688.205	381.549	470.257	473.553	463.965	949	948	903	351.955	1812.37	1686.45	2577	3174	3150	1678.89	1691.97	2239.78	2313.53	2346.53	2219.98	2286.54	351.955	1066.03	1200.5	989	1052	1013	498.38	499.55	507.123	1673.81	1810.79	3048.22	2649.65
367.257	698.551	383.044	468.607	473.517	466.452	954	946	896	367.257	1836.24	1710.8	2605	3170	3222	1695.16	1708.22	2276.57	2330.52	2359	2227.25	2306.55	367.257	1092.65	1226.82	994	1070	1032	500.786	499.679	506.595	1686.44	1830.33	3061.33	2657.54
382.559	708.131	384.16	468.238	470.869	465.339	955	946	899	382.559	1857.07	1741.07	2639	3208	3204	1713.36	1724.67	2288.92	2334.35	2358.47	2239.52	2309.33	382.559	1120.83	1265.63	985	1059	1026	498.338	505.305	508.836	1706.35	1846.49	3076.57	2677.67
397.861	712.819	381.128	468.071	472.293	466.885	955	950	904	397.861	1877.29	1756.52	2633	3239	3216	1725.76	1737.08	2307.74	2341.98	2352.72	2248.4	2321.36	397.861	1146.94	1289.27	999	1078	1032	501.22	502.265	513.936	1722.16	1862.18	3087.12	2684.27
413.163	725.55	386.405	470.825	472.969	467.705	955	945	913	413.163	1891.9	1774.96	2693	3290	3254	1732.88	1745.9	2316.79	2357.71	2362.49	2260.3	2335.26	413.163	1173.97	1323.97	999	1075	1051	502.962	504.976	512.356	1735.64	1877.87	3098.69	2696.37
428.466	730.027	381.767	469.348	470.263	466.242	954	946	907	428.466	1913.38	1795.74	2676	3273	3307	1746.66	1760.25	2318.54	2355.76	2373.69	2265.59	2341.38	428.466	1198.72	1351.56	1002	1094	1048	499.377	506.072	506.414	1747.6	1886.3	3114.35	2711.12
443.768	737.426	384.055	464.671	470.215	460.774	954	939	898	443.768	1931.06	1813.64	2670	3262	3298	1756.92	1773.52	2334.36	2369.52	2380.94	2286.4	2356.5	443.768	1226.06	1381.28	999	1082	1037	501.41	505.52	511.848	1762.51	1905.95	3130.53	2723.12
459.07	746.796	385.639	467.989	471.249	463.91	939	936	895	459.07	1954.22	1840.9	2718	3281	3302	1774.59	1787.58	2342.86	2381.56	2389.39	2288.82	2360.8	459.07	1256.17	1415.7	999	1089	1039	500.899	507.081	514.261	1766.71	1917.52	3151.18	2735.48
474.373	751.828	382.567	469.98	475.251	466.042	955	939	901	474.373	1965.81	1857.73	2719	3342	3364	1782.32	1795.31	2350.77	2394	2402.08	2291.14	2375	474.373	1280.52	1443.22	1001	1106	1051	507.148	512.044	519.07	1787.29	1926.07	3157.41	2744.68
489.675	756.706	384.68	468.35	468.759	465.267	954	938	898	489.675	1988.61	1873.16	2721	3349	3354	1793.93	1804.03	2359.16	2393.82	2401.37	2302.08	2382.54	489.675	1303.41	1471.7	1002	1101	1052	507.383	511.768	516.005	1799.28	1939.54	3162.42	2747.11
504.978	764.213	383.207	467.42	470.85	466.746	955	934	891	504.978	2004.75	1897.49	2768	3373	3352	1806.86	1821.34	2363.94	2408.02	2420.65	2310.36	2391.63	504.978	1327.73	1498.31	1018	1110	1054	508.046	514.829	520.227	1811.38	1954.79	3180.98	2762.22
520.281	770.242	383.82	470.134	468.578	465.903	980	944	914	520.281	2022.49	1911.57	2803	3440	3442	1813.53	1830.75	2372.85	2415.02	2420.63	2317.76	2403.2	520.281	1353.27	1525.09	1028	1133	1084	508.553	514.284	520.683	1817.83	1965.14	3186.45	2772.02
535.583	775.614	385.536	469.331	468.597	462.805	959	940	910	535.583	2037.86	1932.85	2774	3448	3435	1827.18	1840.26	2386.73	2421.09	2431.46	2327.85	2411.3	535.583	1378.92	1554.58	1027	1126	1071	511.118	513.028	521.083	1831.29	1974.92	3195.42	2775.8
550.885	779.703	384.209	470.444	470.643	464.893	961	936	902	550.885	2054.93	1943.94	2795	3382	3419	1832.99	1848.96	2395.08	2431	2443.97	2336.27	2420.83	550.885	1398.55	1576.7	1026	1111	1072	510.671	517.465	523.416	1843.15	1980.57	3207.11	2786.03
566.187	789.707	387.607	469.366	467.407	463.28	955	936	906	566.187	2071.06	1964.53	2808	3424	3432	1845.33	1862.68	2397.66	2434.16	2449.68	2340.09	2423.21	566.187	1425.65	1607.33	1019	1113	1069	509.433	512.501	521.44	1849.74	1995.09	3223.55	2803.2
581.49	789.571	384.511	468.9	472.47	467.547	956	930	900	581.49	2084.11	1978.99	2799	3448	3457	1850.63	1865.94	2404.54	2440.87	2446.47	2347.49	2427.36	581.49	1443.59	1629.08	1027	1114	1064	515.103	523.97	528.58	1862.57	2001.11	3219.83	2796.65
596.791	793.548	384.955	464.326	467.468	465.775	958	944	903	596.791	2096.92	1992.59	2807	3495	3445	1859.74	1876.35	2410.73	2449.05	2453.31	2352.22	2436.08	596.791	1470.19	1651.67	1027	1117	1075	508.522	518.778	525.098	1874.91	2014.15	3237.27	2809.8
612.093	801.488	385.569	465.289	468.693	460.774	958	943	899	612.093	2115.65	2011.36	2820	3469	3468	1872.44	1892.82	2413.23	2454.75	2463.83	2357.47	2440.63	612.093	1496.42	1681.41	1028	1130	1073	516.373	518.52	525.717	1875.32	2018.47	3234.33	2806.36
627.395	804.137	387.43	466.726	467.968	464.346	959	935	912	627.395	2127.97	2025.95	2824	3488	3479	1878.83	1899.19	2426.96	2459.83	2470.85	2366.84	2454.07	627.395	1515.23	1704.34	1034	1136	1086	515.209	522.056	528.69	1886.99	2028.82	3250.75	2821.74
642.698	808.242	387.938	466.959	471.049	464.175	967	951	905	642.698	2147.79	2037.99	2862	3526	3523	1889.88	1910.28	2424.27	2465.11	2470.02	2366.46	2450.62	642.698	1535.11	1727.61	1047	1143	1098	517.695	523.302	533.121	1893.66	2038.04	3260.1	2828.05
658.001	811.762	386.211	467.385	468.915	464.063	962	943	910	658.001	2155.14	2054.61	2865	3494	3521	1896.16	1915.08	2436.28	2474.3	2489.89	2375.59	2461.79	658.001	1556.03	1746.79	1052	1142	1104	518.415	524.541	531.738	1901.55	2048.4	3267.02	2832.51
673.303	817.931	388.126	463.394	467.412	464.93	958	942	911	673.303	2172.01	2068.39	2882	3528	3536	1906.72	1928.63	2437.91	2475.9	2488.9	2376.35	2466.43	673.303	1578.11	1773.77	1048	1133	1106	517.174	519.499	530.698	1910.45	2059.62	3270.06	2837.56
688.604	821.008	390.796	467.923	471.232	464.339	959	943	909	688.604	2191.16	2087.56	2906	3544	3568	1921.26	1941.75	2450.96	2484.42	2496.1	2380.68	2469.21	688.604	1599.36	1798.09	1044	1154	1096	522.999	524.076	532.975	1913.6	2056.22	3281.94	2844.79
703.906	823.048	389.099	466.336	469.226	460.654	965	943	906	703.906	2198.09	2095.26	2897	3561	3576	1923.12	1942.04	2447.9	2487.46	2498.81	2391.48	2477.65	703.906	1617.82	1811.53	1064	1147	1108	520.126	523.991	533.445	1924.48	2067.47	3290.71	2853.97
719.208	824.923	386.538	464.963	463.751	458.589	964	947	896	719.208	2212.15	2110.08	2894	3578	3555	1925.72	1950.63	2448.59	2486.49	2497.83	2392.85	2473.63	719.208	1636.05	1838.03	1057	1152	1105	519.524	522.293	529.143	1927.65	2072.1	3296.04	2856.24
734.511	829.03	389.459	463.803	467.152	459.516	958	939	899	734.511	2224.64	2123.03	2885	3514	3592	1934.4	1960.81	2455.76	2492.67	2511.83	2404.1	2495.52	734.511	1653.46	1856.69	1062	1157	1108	518.414	527.041	530.839	1945.58	2086.5	3295.61	2853.83
749.814	830.266	390.57	468.134	472.028	465.962	963	934	900	749.814	2232.22	2133.87	2901	3559	3590	1939.03	1961.71	2468.54	2501.58	2516.17	2409.51	2490.78	749.814	1674.97	1874.18	1061	1151	1116	526.263	530.366	537.525	1942.86	2087.15	3306.63	2864.23
765.116	835.046	393.781	464.951	464.398	460.969	974	936	909	765.116	2246.1	2148.32	2929	3610	3618	1948.96	1973.15	2461.75	2505.06	2506.67	2403.76	2492.22	765.116	1694.26	1894.6	1061	1159	1110	521.077	523.938	538.16	1949.67	2093.3	3306.45	2867.4
780.419	834.081	392.177	465.248	464.043	460.213	964	944	911	780.419	2257.37	2158.27	2926	3578	3616	1954.44	1979.36	2469.56	2509.67	2522.32	2413.09	2504.33	780.419	1711.88	1912.98	1055	1171	1115	525.496	527.615	538.034	1963.87	2102.25	3308.86	2867.4
795.721	839.476	393.193	466.188	466.807	460.652	967	938	911	795.721	2272.99	2174.69	2935	3593	3637	1960	1987.94	2481.71	2510.22	2521.21	2414.38	2505.59	795.721	1730.83	1932.77	1067	1173	1115	529.11	531.076	538.243	1963.59	2107.3	3321.11	2867.95
811.023	842.208	396.284	467.49	465.131	463.431	962	941	912	811.023	2280.83	2184.02	2925	3599	3604	1966.67	1992.33	2485.58	2519.95	2536.52	2421.01	2514.9	811.023	1747.61	1948.59	1068	1173	1111	521.589	528.377	541.324	1965.57	2114.37	3323.81	2872.52
826.325	843.579	393.055	465.443	467.041	462.312	953	938	898	826.325	2291.75	2191.22	2927	3592	3613	1971.01	1998.91	2483.85	2517.8	2528.13	2424.36	2519.66	826.325	1763.44	1967.21	1067	1162	1129	527.451	533.039	540.509	1979.04	2118.92	3328.73	2887.14
841.627	846.786	397.569	464.546	467.602	466.004	951	936	900	841.627	2303.07	2208.38	2951	3615	3619	1982.44	2013.4	2486.5	2530.8	2540.15	2422.36	2509.08	841.627	1782	1983.95	1074	1176	1120	524.101	533.06	542.101	1980.52	2121.22	3329.47	2882.27
856.929	850.329	396.199	464.063	465.919	460.842	970	944	908	856.929	2307.81	2214.88	2958	3621	3645	1985.17	2011.63	2488.79	2521.07	2536	2431.84	2524.89	856.929	1793.88	1997.28	1083	1166	1126	527.011	534.722	542.996	1988	2130.17	3338.31	2892.45
872.231	848.048	394.841	463.327	463.88	459.753	951	946	901	872.231	2319.66	2222.03	2937	3642	3634	1980.47	2014.4	2489.05	2527.81	2540.79	2434.28	2532.1	872.231	1807.4	2012.9	1076	1167	1131	526.893	529.262	539.01	1990.97	2137	3346.71	2894.57
887.533	852.4	396.342	465.803	464.269	462.152	960	937	904	887.533	2324.66	2234.1	2988	3627	3613	1989.59	2018.25	2494.13	2539.11	2549.17	2434.26	2531.72	887.533	1822.67	2025.79	1067	1179	1129	529.261	535.299	547.133	2000.89	2141.33	3351.09	2903.72
902.835	853.79	396.154	463.198	462.779	462.208	959	936	900	902.835	2339.56	2242.87	2980	3615	3633	1995.08	2024.48	2500.46	2529.16	2544.63	2436.02	2533.97	902.835	1836.56	2042.61	1083	1172	1135	525.922	532.779	541.573	2004.18	2141.83	3359.81	2907.27
918.137	854.748	397.092	468.194	470.196	463.656	960	939	904	918.137	2344.67	2246.91	2964	3649	3658	1995.9	2026.8	2509.81	2544.79	2556.06	2449.41	2539.76	918.137	1848.15	2053.94	1075	1186	1133	534.576	537.471	545.377	2008.54	2150.41	3354.68	2900.08
933.439	860.562	398.962	461.096	462.391	460.511	967	931	893	933.439	2353.34	2262.07	2964	3622	3647	2003.35	2036.59	2498.88	2537.23	2551.08	2445.3	2538.07	933.439	1865.78	2070.58	1083	1182	1133	526.933	534.358	548.061	2013.66	2155.28	3360.85	2908.44
948.742	861.41	399.135	466.14	463.487	462.422	959	929	909	948.742	2362	2272.03	2975	3670	3682	2008.9	2042.87	2505.34	2537.23	2557.3	2445.27	2545.26	948.742	1878.96	2083.7	1077	1187	1130	535.062	533.082	546.075	2015.54	2157.16	3371.5	2906.14
964.044	863.358	400.378	461.445	463.817	463.746	962	945	898	964.044	2374.44	2280.26	3010	3698	3682	2016	2048.44	2513.68	2550.09	2563.77	2450.13	2545.94	964.044	1894.37	2096.72	1099	1194	1132	536.162	541.845	548.854	2021.65	2166.09	3360.14	2915.11
979.346	863.644	402.249	464.39	466.687	460.533	976	951	913	979.346	2381.18	2288.49	3028	3674	3738	2020.43	2054.41	2516.03	2546.99	2560.51	2455.67	2553.77	979.346	1902.63	2108.77	1097	1195	1140	530.732	539.757	548.814	2030.12	2176.63	3366.61	2918.68
994.647	863.482	400.65	459.49	461.13	456.763	974	944	907	994.647	2381.8	2291.54	3016	3710	3719	2019.9	2053.08	2511.42	2543.97	2556.82	2460.91	2552.68	994.647	1915.79	2117.16	1086	1196	1136	528.492	532.083	542.297	2030.03	2171.75	3374.55	2912.03
1009.95	866.304	401.416	461.604	461.248	460.515	965	945	906	1009.95	2390.13	2299.56	2995	3678	3693	2023.26	2060.28	2517.26	2546.85	2564.3	2463.19	2556.03	1009.95	1927.43	2128.02	1099	1202	1144	534.226	541.564	546.408	2034.72	2179.16	3386.1	2927.79
1025.25	870.814	401.883	468.107	464.116	462.479	958	938	908	1025.25	2401.3	2311.41	3033	3708	3729	2032.66	2066.61	2526.48	2561.67	2570.26	2461.22	2559.6	1025.25	1941.21	2141.34	1092	1208	1150	538.082	541.057	554.707	2038.4	2179.79	3385.09	2925.95
1040.55	870.009	404.685	462.844	463.96	457.307	969	940	908	1040.55	2405.79	2317.44	3003	3698	3670	2034.99	2069.7	2519.79	2553.91	2569.69	2468.92	2563.26	1040.55	1949.01	2148.82	1103	1215	1144	536.78	540.436	549.17	2042.29	2189.31	3392.88	2930.74
1055.86	870.07	403.922	461.659	458.576	458.432	957	941	901	1055.86	2412.94	2326.79	3005	3740	3702	2038.11	2071.31	2522.79	2560.89	2571.8	2466.35	2556.74	1055.86	1961.79	2162.56	1100	1206	1148	531.122	539.554	548.772	2044.2	2190.47	3381.46	2929.25
1071.16	868.113	403.972	460.347	463.463	458.73	958	938	904	1071.16	2415.93	2330.63	3012	3720	3701	2038.53	2073.2	2526.74	2562.08	2568.44	2469.73	2566.06	1071.16	1969.07	2167.47	1098	1204	1147	533.609	541.722	548.857	2054.85	2190.72	3394.93	2936.72
1086.46	875.342	405.112	461.006	462.499	456.456	968	938	903	1086.46	2424.83	2334.37	3023	3698	3713	2043.8	2080.82	2531.6	2565.12	2572.11	2472.97	2562.65	1086.46	1982.62	2177.37	1091	1214	1144	536.032	540.784	548.299	2057.39	2201.4	3400.81	2942.78
1101.76	874.58	404.916	459.711	458.88	454.809	971	943	901	1101.76	2427.26	2340.9	3017	3723	3742	2043.54	2082.72	2524.62	2561.66	2580.92	2472.08	2570.62	1101.76	1989.2	2183.16	1112	1210	1156	532.86	539.422	550.76	2062.08	2203.56	3393.35	2932.66
1117.07	874.286	405.793	465.405	466.877	458.093	965	935	912	1117.07	2436.82	2349.3	3031	3721	3750	2050.46	2086.65	2538.14	2572.28	2583.58	2475.43	2575.28	1117.07	1999.19	2194.47	1108	1219	1155	539.212	543.248	553.186	2062.38	2203.77	3404.99	2939.16
1132.37	879.642	405.912	461.685	462.995	458.775	953	940	901	1132.37	2445.35	2362.17	3031	3713	3707	2055.84	2090.58	2536.29	2560.58	2581.69	2479.79	2575.9	1132.37	2013.58	2204.58	1099	1218	1157	537.532	546.183	552.459	2070.99	2214.41	3405.06	2938.52
1147.67	878.568	407.343	460.816	462.255	457.981	965	940	901	1147.67	2450.12	2364.18	3043	3720	3720	2058.58	2094.8	2544.33	2571.31	2584.13	2480.95	2573.25	1147.67	2017.85	2211.92	1110	1224	1161	540.95	543.546	553.171	2069.83	2213.2	3409.59	2950.23
1162.97	879.303	407.716	463.141	461.919	457.934	963	953	899	1162.97	2456.12	2370.16	3046	3732	3741	2063	2097.68	2543.02	2574.22	2592.99	2480.38	2576.38	1162.97	2026.07	2217.57	1110	1217	1157	539.935	542.55	550.306	2072.78	2215.58	3411.97	2944.72
1178.28	882.344	412.193	463.204	464.058	459.067	968	938	907	1178.28	2457.79	2380.78	3044	3730	3759	2066.63	2104.44	2549.69	2574.03	2593.32	2481.05	2574.96	1178.28	2034.24	2225.24	1114	1219	1164	538.085	546.338	555.652	2075.25	2218.58	3413.18	2949.53
1193.58	881.188	409.974	464.97	468.215	456.126	969	946	905	1193.58	2465.34	2383.48	3041	3732	3760	2068.77	2104.84	2544.65	2576.53	2592.63	2492.05	2579.27	1193.58	2040.1	2227.26	1115	1228	1166	537.52	544.876	554.692	2076.63	2225.65	3418.45	2950.68
1208.88	883.014	409.296	460.544	466.421	458.104	964	951	914	1208.88	2471.8	2391.83	3044	3737	3738	2072.53	2111.02	2551.34	2585.13	2598.89	2484.94	2583.66	1208.88	2046.14	2234.64	1118	1237	1165	540.082	546.032	558.37	2079.77	2227.8	3422.65	2949.45
1224.18	880.093	408.842	458.656	462.488	459.591	969	954	918	1224.18	2475.72	2394.56	3069	3762	3768	2078.17	2109.71	2547.83	2574.1	2596.05	2505.05	2592.4	1224.18	2054	2239.76	1116	1233	1172	540.396	548.145	557.121	2094.18	2239.86	3418.92	2957.65
1239.48	886.135	413.136	461.315	462.064	454.151	973	947	920	1239.48	2487.53	2405.2	3075	3795	3815	2080.28	2115.76	2554.39	2585.19	2601.26	2496.93	2587.6	1239.48	2064.47	2248.81	1120	1241	1176	541.665	545.609	555.758	2091.92	2240.5	3413.37	2952.31
1254.79	887.828	410.883	462.668	464.292	461.149	981	954	901	1254.79	2491.09	2415.52	3056	3806	3809	2090.57	2123.64	2552.12	2587.12	2606.55	2498.7	2586.85	1254.79	2069.36	2245.69	1130	1233	1170	542.187	549.919	557.282	2095.79	2248.17	3425.03	2961
1270.09	886.207	410.256	463.269	460.778	456.888	975	947	908	1270.09	2494.79	2417.04	3083	3813	3757	2090.16	2124.03	2551.89	2582.05	2602.29	2507.64	2596.74	1270.09	2072.85	2242.65	1133	1240	1175	535.441	546.095	554.613	2100.65	2247.89	3425.46	2955.23
1285.39	885.108	412.218	460.75	460.496	455.787	975	954	919	1285.39	2506.69	2425.75	3079	3782	3793	2095.09	2128.25	2557.78	2594.49	2608.29	2499.89	2589.57	1285.39	2080.73	2244.01	1119	1226	1171	540.721	546.569	556.613	2096.83	2242.89	3436.74	2961.94
1300.69	887.442	408.295	464.003	465.297	460.388	973	939	916	1300.69	2508.25	2434.16	3078	3778	3828	2097.55	2134.64	2565.38	2595.19	2608.93	2497.67	2591.98	1300.69	2088.56	2240.99	1134	1237	1180	545.208	550.066	561.208	2103.49	2246	3430.38	2958.99
1315.99	887.134	411.668	461.773	464.287	455.153	988	957	922	1315.99	2511.85	2436.73	3101	3805	3797	2096.96	2133.17	2560.83	2594.39	2616.59	2500.25	2600.78	1315.99	2089.49	2223.86	1137	1245	1184	542.931	548.722	556.261	2103.17	2250.62	3430.45	2957.41

## Sheet: Holo-SOD1
Thioflavin-T
Time	Holo-WT				Time	Holo-E40K				Time	Holo-T18S
0	305.796	312.37	302.611		0	311.664	324.047	311.509		0	314.24	328.016	329.456
15.3026	302.216	306.857	304.694		15.3026	309.65	318.448	311.198		15.3026	315.07	328.985	330.503
30.6052	302.631	308.59	305.493		30.6052	309.744	317.634	314.761		30.6052	313.7	329.393	333.803
45.9069	303.219	303.371	305.609		45.9069	308.309	312.259	315.287		45.9069	311.03	324.632	328.487
61.2095	303.725	303.562	308.21		61.2095	308.822	312.371	315.541		61.2095	311.238	329.168	332.158
76.5117	303.109	304.731	307.988		76.5117	307.988	311.696	316.184		76.5117	310.543	329.671	332.044
91.8144	304.232	304.612	308.948		91.8144	310.497	308.793	313.749		91.8144	311.891	329.622	330.599
107.116	303.924	304.614	308.334		107.116	307.709	308.715	313.976		107.116	311.983	329.064	329.651
122.419	302.018	302.249	305.731		122.419	306.737	304.957	313.241		122.419	309.772	326.345	331.536
137.722	303.718	306.732	309.52		137.722	310.913	306.345	317.263		137.722	311.939	329.289	332.517
153.023	301.149	303.466	307.559		153.023	306.25	306.25	312.437		153.023	309.815	329.76	328.8
168.325	305.126	305.196	308.058		168.325	308.606	307.047	315.405		168.325	312.331	327.935	330.07
183.627	302.299	304.232	308.716		183.627	309.637	307.395	314.906		183.627	311.588	327.672	331.745
198.93	302.138	307.477	309.559		198.93	310.1	307.703	315.269		198.93	312.12	328.273	329.456
214.233	303.702	305.548	307.951		214.233	309.034	308.028	313.984		214.233	309.505	327.852	330.741
229.535	305.847	306.156	310.877		229.535	308.71	308.239	316.514		229.535	312.357	329.273	329.164
244.838	304.359	304.271	309.614		244.838	309.761	308.144	315.947		244.838	310.869	328.053	329.881
260.141	302.519	305.764	306.924		260.141	309.716	304.214	314.261		260.141	310.034	325.121	327.951
275.443	303.386	305.855	311.197		275.443	308.945	307.868	314.282		275.443	309.578	327.685	329.201
290.746	302.636	304.947	308.2		290.746	304.951	305.488	314.157		290.746	309.523	326.766	329.11
306.047	303.69	304.771	307.016		306.047	307.166	307.403	313.829		306.047	309.346	327.939	330.209
321.35	302.567	306.817	308.364		321.35	311.303	308.596	316.188		321.35	310.236	327.699	330.376
336.652	299.947	304.75	307.771		336.652	308.848	307.063	314.809		336.652	309.313	328.686	329.251
351.955	303.955	306.729	309.062		351.955	309.287	306.414	314.381		351.955	310.834	326.306	329.934
367.257	305.527	307.762	310.933		367.257	311.706	308.528	316.36		367.257	311.474	326.732	330.704
382.559	302.899	304.055	309.478		382.559	309.084	308.297	314.809		382.559	311.026	325.486	329.135
397.861	300.32	300.242	302.947		397.861	304.571	302.711	311.992		397.861	305.735	323.278	326.664
413.163	302.117	305.981	308.068		413.163	309.305	306.444	315.014		413.163	310.782	326.255	329.473
428.466	304.201	305.899	307.219		428.466	309.688	306.899	315.398		428.466	311.639	327.649	327.98
443.768	302.663	305.606	307.228		443.768	309.629	307.919	313.889		443.768	310.799	323.027	328.26
459.07	301.906	302.213	304.846		459.07	308.238	306.075	313.967		459.07	310.047	325.277	326.536
474.373	303.493	306.039	308.979		474.373	308.431	306.261	315.789		474.373	310.38	325.229	329.298
489.675	302.532	301.368	305.623		489.675	306.083	305.082	313.67		489.675	308.099	324.657	329.113
504.978	300.647	300.878	305.669		504.978	306.834	302.421	313.718		504.978	307.226	322.363	325.669
520.281	300.599	304.235	306.325		520.281	308.26	305.233	313.058		520.281	308.498	323.893	325.578
535.583	301.533	303.775	307.727		535.583	310.506	306.864	313.049		535.583	310.445	325.826	327.804
550.885	301.658	303.052	307.998		550.885	308.856	307.296	316.057		550.885	309.018	325.523	328.9
566.187	302.896	304.827	308.233		566.187	310.331	306.056	314.58		566.187	310.641	328.436	328.712
581.49	305.048	305.496	310.149		581.49	310.071	308.601	318.121		581.49	311.551	327.276	330.32
596.791	301.788	306.427	307.046		596.791	307.659	307.582	316.02		596.791	311.542	323.41	326.117
612.093	301.489	303.42	307.228		612.093	308.997	306.747	314.406		612.093	310.709	324.308	327.466
627.395	299.126	303.54	306.405		627.395	308.488	306.322	312.665		627.395	309.741	324.036	328.977
642.698	303.85	307.248	308.641		642.698	309.794	308.099	317.139		642.698	311.513	327.288	327.696
658.001	303.527	304.301	309.022		658.001	310.174	306.844	316.271		658.001	312.117	325.641	328.601
673.303	302.586	302.58	306.07		673.303	306.602	306.437	315.33		673.303	310.331	323	326.599
688.604	303.372	303.982	305.759		688.604	309.777	304.137	315.275		688.604	310.566	325.406	326.917
703.906	302.304	301.525	306.014		703.906	308.884	305.313	313.122		703.906	306.793	324.525	326.792
719.208	302.229	302.378	307.26		719.208	310.195	307.172	312.207		719.208	307.642	325.051	327.57
734.511	301.846	301.765	304.706		734.511	308.176	305.549	312.965		734.511	307.73	323.877	327.187
749.814	302.83	305.918	308.238		749.814	309.088	307.613	314.4		749.814	312.335	325.246	328.615
765.116	301.7	303.477	307.885		765.116	310.824	305.634	313.907		765.116	307.659	324.321	326.178
780.419	300.245	304.656	304.807		780.419	308.905	305.885	314.45		780.419	307.906	325.298	326.148
795.721	301.398	303.95	307.592		795.721	308.824	305.106	315.542		795.721	306.585	326.152	327.179
811.023	301.532	301.142	305.321		811.023	308.029	307.791	313.126		811.023	305.329	324.2	327.747
826.325	300.894	302.983	304.686		826.325	307.39	306.147	311.799		826.325	308.253	324.348	326.81
841.627	302.058	304.919	307.325		841.627	308.01	307.236	314.12		841.627	308.332	324.272	329.449
856.929	301.469	304.713	307.033		856.929	310.512	306.956	316.311		856.929	306.502	325.629	326.713
872.231	300.93	300.619	305.879		872.231	308.032	304.402	312.365		872.231	305.724	323.185	324.943
887.533	301.78	305.176	307.964		887.533	308.035	307.185	312.98		887.533	307.666	325.361	325.497
902.835	299.519	302.924	306.101		902.835	309.501	306.865	313.04		902.835	306.648	324.57	326.931
918.137	303.584	304.819	308.851		918.137	310.848	309.147	315.192		918.137	309.696	324.867	328.007
933.439	303.637	308.582	310.911		933.439	312.363	309.65	319.18		933.439	313.156	328.154	329.46
948.742	300.694	300.771	304.33		948.742	307.651	305.336	311.285		948.742	305.259	323.365	325.881
964.044	301.429	304.605	305.921		964.044	309.864	306.067	314.971		964.044	307.47	321.782	326.486
979.346	302.089	302.164	304.944		979.346	307.494	305.639	316.159		979.346	307.969	322.809	325.554
994.647	303.043	306.367	305.128		994.647	309.146	306.13	315.334		994.647	308.78	324.362	327.287
1009.95	302.398	302.781	306.81		1009.95	308.578	305.64	315.382		1009.95	308.359	322.668	325.648
1025.25	302.942	302.861	305.646		1025.25	308.115	305.564	314.608		1025.25	307.126	323.129	325.198
1040.55	302.985	302.748	306.922		1040.55	309.249	305.685	315.506		1040.55	309.108	323.393	325.133
1055.86	301.25	303.182	303.182		1055.86	306.5	304.185	312.536		1055.86	305.044	321.058	323.01
1071.16	298.702	300.792	302.264		1071.16	305.898	305.198	310.756		1071.16	305.516	320.752	322.799
1086.46	304.099	305.481	310.283		1086.46	310.592	309.122	316.396		1086.46	311.298	325.294	329.053
1101.76	302.63	306.416	308.279		1101.76	311.204	309.363	316.628		1101.76	310.308	324.769	330.057
1117.07	303.21	304.136	309.707		1117.07	312.337	306.839	317.507		1117.07	310.721	325.76	327.079
1132.37	301.724	304.044	307.379		1132.37	309.309	309.759	314.717		1132.37	309.316	323.71	326.714
1147.67	300.904	303.148	306.173		1147.67	307.704	306.854	314.918		1147.67	306.953	322.506	324.402
1162.97	300.388	303.249	305.807		1162.97	307.82	307.415	314.776		1162.97	307.444	323.381	324.968
1178.28	300.678	302.146	306.095		1178.28	309.718	307.482	314.907		1178.28	307.333	322.331	325.463
1193.58	300.764	304.711	305.636		1193.58	309.503	307.802	315.602		1193.58	307.736	323.059	325.731
1208.88	301.779	304.484	305.958		1208.88	309.738	306.568	315.15		1208.88	308.514	320.656	324.64
1224.18	299.662	303.608	304.691		1224.18	308.476	305.148	314.142		1224.18	306.394	325.292	323.976
1239.48	301.623	305.572	306.337		1239.48	310.435	309.901	315.306		1239.48	310.219	324.448	325.861
1254.79	304.319	305.396	307.563		1254.79	310.342	308.105	315.989		1254.79	307.104	325.214	329.827
1270.09	303.015	304.091	305.799		1270.09	309.896	306.104	314.915		1270.09	307.431	323.226	325.745
1285.39	301.732	304.056	308.157		1285.39	311.72	307.615	315.877		1285.39	308.868	323.801	327.428
1300.69	300.068	302.077	303.863		1300.69	307.266	307.105	312.983		1300.69	306.109	322.375	323.323
1315.99	299.804	303.054	306.072		1315.99	307.845	301.97	315.82		1315.99	305.844	320.54	325.434
