# Supplementary material for: Canine SOD1 harboring E40K or T18S mutations promotes protein aggregation without reducing the global structural stability
Source: PeerJ. 2020 Jul 15;8:e9512. doi: 10.7717/peerj.9512 (PMC7368427; doi:10.7717/peerj.9512)
Supplement: Data S3 [file peerj-08-9512-s003.xlsx]

## Sheet: Sheet1
Tm_CD_wavelength
	WT holo					E40K holo					T18S holo					WT apo					E40K apo					T18S apo
		220 nm					220 nm					220 nm					220 nm					220 nm					220 nm
	℃	Wavelength				℃	Wavelength				℃	Wavelength				℃	Wavelength				℃	Wavelength				℃	Wavelength
	20.5	-6.64273	-5.64702	-9.97599		20.5	-9.67114	-10.9532	-10.5008		20.5	-11.3582	-9.97501	-7.17033		20.5	-6.25904	-8.55567	-5.65089		20.5	-5.73531	-6.27309	-5.23442		20.5	-5.31285	-6.0973	-5.189
	21.5	-6.95614	-6.04213	-10.2829		21.5	-9.95149	-10.8479	-10.5027		21.5	-11.4491	-10.0786	-7.18601		21.5	-6.03889	-8.6258	-6.01037		21.5	-6.171	-6.10677	-5.50191		21.5	-4.84401	-5.83142	-5.51727
	22.5	-6.6254	-5.83208	-9.97033		22.5	-10.0141	-10.96	-10.6185		22.5	-11.5719	-10.2217	-7.45382		22.5	-5.95803	-8.544	-5.31049		22.5	-6.24439	-6.09695	-5.40938		22.5	-5.20789	-5.84014	-5.53478
	23.5	-7.00864	-5.76826	-10.1389		23.5	-9.76613	-10.9601	-10.7294		23.5	-11.7414	-10.1256	-7.19945		23.5	-6.24963	-8.66288	-5.32363		23.5	-5.76644	-6.11168	-5.53025		23.5	-5.31551	-6.08487	-5.23719
	24.5	-6.84937	-5.76719	-9.97637		24.5	-10.2327	-10.8993	-10.5725		24.5	-11.5617	-10.0759	-7.25404		24.5	-6.14043	-8.72484	-5.7134		24.5	-5.94114	-6.04677	-5.54208		24.5	-5.09603	-6.32877	-5.13683
	25.5	-6.6688	-5.78223	-9.91242		25.5	-10.0067	-11.0539	-10.7643		25.5	-11.8861	-10.2475	-7.23922		25.5	-6.29022	-8.5683	-5.47281		25.5	-5.6639	-6.22479	-5.38289		25.5	-5.19759	-6.23111	-5.3961
	26.5	-6.93065	-5.63589	-10.0526		26.5	-9.95908	-10.7571	-10.6084		26.5	-11.4674	-10.1916	-7.07044		26.5	-6.38464	-8.57695	-5.62975		26.5	-5.71882	-6.00452	-5.64679		26.5	-5.13413	-6.23915	-5.56024
	27.5	-6.82931	-5.94828	-9.96608		27.5	-9.9142	-10.9974	-10.6072		27.5	-11.3273	-10.2367	-7.21939		27.5	-6.16038	-8.58683	-5.57942		27.5	-5.85767	-6.35461	-5.27791		27.5	-5.22397	-6.38073	-5.59859
	28.5	-6.85412	-5.61187	-9.90746		28.5	-9.8653	-10.899	-10.8349		28.5	-11.3378	-10.1978	-7.37406		28.5	-6.07531	-8.7367	-5.50027		28.5	-6.04351	-6.05895	-5.97864		28.5	-5.16582	-5.96662	-5.30881
	29.5	-6.77787	-5.86251	-10.0192		29.5	-10.1299	-10.855	-10.7587		29.5	-11.7308	-10.3257	-7.26664		29.5	-6.4618	-8.63087	-5.42832		29.5	-6.27045	-5.93562	-5.42863		29.5	-5.2675	-5.96491	-5.17751
	30.5	-6.9336	-6.03032	-9.86344		30.5	-9.64903	-11.0662	-10.6857		30.5	-11.4817	-10.2634	-7.0448		30.5	-5.99777	-8.62928	-5.60771		30.5	-5.66125	-6.36851	-5.46807		30.5	-5.28477	-5.91972	-5.363
	31.5	-6.76338	-5.93622	-9.87424		31.5	-9.95258	-10.7865	-10.9733		31.5	-11.5116	-10.3642	-7.47244		31.5	-6.01431	-8.93936	-5.70658		31.5	-5.91736	-6.09123	-5.23145		31.5	-5.12707	-5.94431	-5.33115
	32.5	-6.82199	-5.71149	-10.0478		32.5	-10.4456	-11.1563	-10.7685		32.5	-11.7781	-10.1805	-7.08958		32.5	-5.9855	-8.3305	-5.68885		32.5	-5.92863	-6.17068	-5.64997		32.5	-5.41193	-5.88592	-5.42533
	33.5	-7.17659	-5.8793	-10.1253		33.5	-10.2478	-11.0671	-10.6771		33.5	-11.4013	-10.1971	-7.3438		33.5	-6.16	-8.83108	-5.4059		33.5	-6.08833	-5.9665	-5.44739		33.5	-4.83656	-6.22717	-4.97423
	34.5	-7.21558	-5.89275	-10.2022		34.5	-10.2069	-11.1941	-10.8263		34.5	-11.3366	-10.5162	-7.20557		34.5	-6.04683	-8.56898	-5.68242		34.5	-5.79695	-6.20046	-5.60343		34.5	-4.89668	-5.86963	-5.28159
	35.5	-6.90032	-5.77836	-9.77736		35.5	-10.0329	-10.9623	-10.9427		35.5	-11.4093	-10.5802	-7.52826		35.5	-6.39729	-8.68414	-5.55904		35.5	-6.40693	-6.01015	-5.53646		35.5	-5.31725	-6.46908	-5.73808
	36.5	-6.85822	-5.98034	-9.94188		36.5	-10.148	-11.0954	-10.96		36.5	-11.5434	-10.2069	-7.42333		36.5	-6.169	-8.99081	-5.66012		36.5	-6.24807	-6.04071	-5.46496		36.5	-5.07971	-5.66329	-5.16531
	37.5	-6.93099	-5.98409	-10.2618		37.5	-10.1461	-11.0577	-11.023		37.5	-11.4728	-10.6224	-7.41707		37.5	-6.0965	-8.69589	-5.7227		37.5	-6.25024	-6.19521	-5.69181		37.5	-5.17528	-6.28089	-5.35481
	38.5	-7.16788	-5.58469	-10.1694		38.5	-9.82487	-10.8955	-10.9332		38.5	-11.4811	-10.5044	-7.39465		38.5	-5.93716	-8.65881	-5.58978		38.5	-5.9952	-6.26439	-5.8834		38.5	-5.19827	-6.39578	-5.64303
	39.5	-6.96528	-5.76102	-10.0629		39.5	-10.1983	-11.0506	-11.0069		39.5	-11.581	-10.3488	-7.18101		39.5	-6.35432	-8.77192	-5.43265		39.5	-6.0563	-5.90187	-5.90283		39.5	-5.32158	-6.00022	-5.18729
	40.5	-6.9147	-5.99218	-10.1108		40.5	-9.89816	-11.0092	-10.8513		40.5	-11.4539	-10.5968	-7.10889		40.5	-6.17041	-8.77457	-5.57851		40.5	-6.00923	-6.31668	-5.61175		40.5	-5.31429	-5.94592	-5.62724
	41.5	-6.81278	-6.00142	-10.1311		41.5	-10.3383	-11.0865	-10.8244		41.5	-11.6058	-10.596	-7.3976		41.5	-6.28465	-8.8351	-5.70012		41.5	-6.2025	-5.97328	-5.64229		41.5	-5.21245	-6.34707	-5.4478
	42.5	-7.02851	-5.8709	-10.2353		42.5	-10.0582	-11.0318	-11.0226		42.5	-11.6716	-10.4492	-7.4745		42.5	-6.33189	-8.83494	-5.8798		42.5	-5.8823	-6.46827	-5.79027		42.5	-5.37055	-6.26673	-5.32439
	43.5	-6.76222	-6.03455	-9.82071		43.5	-10.2298	-11.0356	-10.9912		43.5	-11.6226	-10.4452	-7.41265		43.5	-6.54228	-8.70039	-5.86341		43.5	-6.41345	-6.38639	-5.66341		43.5	-5.09799	-6.36372	-5.5899
	44.5	-6.87454	-5.88004	-10.1486		44.5	-9.9749	-10.9606	-11.0244		44.5	-11.1191	-10.4498	-7.64757		44.5	-6.43608	-9.00559	-5.49153		44.5	-6.73259	-6.65416	-6.06986		44.5	-5.53575	-6.52039	-5.50859
	45.5	-6.99752	-5.90522	-9.92194		45.5	-10.1465	-11.0727	-10.9474		45.5	-11.5427	-10.7375	-7.38915		45.5	-6.50567	-8.51383	-5.70527		45.5	-6.47562	-6.62858	-6.00368		45.5	-5.63811	-6.62942	-6.00337
	46.5	-6.94924	-5.95368	-10.225		46.5	-10.101	-11.1449	-11.1034		46.5	-11.5927	-10.6576	-7.4191		46.5	-6.34519	-9.06074	-5.85353		46.5	-6.73627	-6.78604	-6.13281		46.5	-5.68428	-6.50813	-5.51561
	47.5	-6.9872	-6.01828	-10.0398		47.5	-10.119	-11.0472	-10.9459		47.5	-11.5241	-10.5043	-7.28121		47.5	-6.4329	-8.63454	-5.8401		47.5	-6.97684	-6.9158	-6.4623		47.5	-5.9892	-6.91383	-5.91983
	48.5	-6.95823	-5.96883	-9.81865		48.5	-10.1306	-11.1015	-10.8347		48.5	-11.4903	-10.5385	-7.28047		48.5	-6.64178	-8.87368	-5.94783		48.5	-7.18161	-7.32764	-6.37087		48.5	-5.68531	-6.96265	-5.76579
	49.5	-7.0333	-6.07508	-9.99432		49.5	-10.1933	-11.0368	-10.9048		49.5	-11.4031	-10.4778	-7.26652		49.5	-6.79143	-8.85643	-6.15804		49.5	-7.36005	-7.39385	-6.37747		49.5	-5.51984	-7.0199	-5.91765
	50.5	-6.95739	-5.9613	-9.7019		50.5	-10.2405	-11.2041	-10.7897		50.5	-11.3361	-10.2377	-7.38643		50.5	-6.67181	-8.94692	-6.34992		50.5	-7.22462	-7.44111	-6.51455		50.5	-5.88988	-7.26971	-6.05567
	51.5	-7.02362	-6.20093	-9.93478		51.5	-10.2001	-10.8123	-11.2202		51.5	-11.3553	-10.7088	-7.10865		51.5	-6.99146	-8.87368	-6.47435		51.5	-7.56041	-7.50354	-6.83856		51.5	-6.25661	-7.07831	-6.17173
	52.5	-7.1925	-6.12594	-10.4301		52.5	-10.2901	-10.9487	-11.2345		52.5	-11.3961	-10.5963	-7.35859		52.5	-7.08498	-8.95699	-6.46146		52.5	-7.50573	-7.2533	-6.61061		52.5	-5.9014	-7.34123	-6.08715
	53.5	-6.93707	-5.92586	-10.0493		53.5	-10.168	-10.8551	-10.9202		53.5	-11.4389	-10.8267	-7.19537		53.5	-6.78653	-9.07342	-6.41089		53.5	-7.88597	-7.56589	-7.25309		53.5	-6.29049	-7.79444	-6.45413
	54.5	-7.06486	-5.8628	-9.80283		54.5	-10.3701	-10.8195	-11.1228		54.5	-11.3692	-10.535	-7.11218		54.5	-7.03827	-8.82403	-6.5714		54.5	-7.99714	-7.79075	-7.25434		54.5	-6.86307	-7.71115	-6.38274
	55.5	-7.0418	-6.17346	-9.88297		55.5	-10.2626	-10.9516	-11.023		55.5	-11.6847	-10.5991	-7.29446		55.5	-7.27391	-8.95293	-7.10709		55.5	-7.54583	-7.6124	-6.89074		55.5	-6.52555	-8.04456	-6.14601
	56.5	-7.0763	-5.96776	-10.0402		56.5	-10.007	-11.0304	-11.0052		56.5	-11.1051	-10.6263	-7.40047		56.5	-7.31259	-9.14144	-6.78739		56.5	-8.06917	-8.39243	-7.68736		56.5	-6.96842	-7.80785	-6.43783
	57.5	-6.96837	-6.0798	-10.0784		57.5	-10.3075	-10.7443	-11.0699		57.5	-11.4294	-10.7878	-7.18451		57.5	-7.44702	-8.84659	-7.31152		57.5	-8.50067	-8.32411	-7.64904		57.5	-6.6248	-7.95729	-7.13955
	58.5	-7.02103	-5.97149	-9.61987		58.5	-10.3351	-10.6627	-10.9695		58.5	-11.0839	-10.5756	-7.43814		58.5	-7.48669	-9.00929	-7.00658		58.5	-8.31208	-8.80145	-7.21843		58.5	-7.11998	-8.0262	-6.90258
	59.5	-7.28263	-6.01776	-9.70655		59.5	-9.99313	-10.7318	-10.9845		59.5	-11.3344	-10.4107	-7.07436		59.5	-7.79373	-9.16626	-7.32479		59.5	-8.76307	-8.86389	-8.368		59.5	-7.27337	-8.08656	-7.0311
	60.5	-7.05586	-6.12479	-9.84686		60.5	-10.0712	-10.9903	-11.0013		60.5	-11.4734	-10.7144	-7.29345		60.5	-7.89952	-8.94676	-7.47849		60.5	-9.09227	-9.23157	-8.43665		60.5	-6.97394	-8.36837	-7.23744
	61.5	-7.10052	-6.08092	-9.80985		61.5	-10.2678	-11.1659	-10.8726		61.5	-11.237	-10.669	-7.27844		61.5	-8.1294	-9.04188	-7.48189		61.5	-9.23366	-9.36358	-8.52995		61.5	-6.94799	-8.52687	-7.28403
	62.5	-7.1148	-6.13569	-9.90533		62.5	-10.2291	-10.7539	-11.1277		62.5	-11.3384	-10.7614	-7.34552		62.5	-7.62939	-8.77803	-7.63721		62.5	-9.63261	-9.31041	-8.44356		62.5	-7.49837	-8.53568	-7.67877
	63.5	-7.19942	-6.03335	-10.0629		63.5	-10.2718	-10.8405	-10.8503		63.5	-11.2348	-10.9032	-7.24296		63.5	-8.13937	-8.91633	-7.20025		63.5	-9.78567	-9.80716	-8.57424		63.5	-7.53419	-8.39911	-7.27983
	64.5	-7.23605	-6.13654	-9.81295		64.5	-10.2856	-11.0956	-11.0096		64.5	-11.1361	-10.4794	-7.53749		64.5	-8.34207	-9.10207	-7.78411		64.5	-9.86216	-9.9919	-8.82946		64.5	-7.88944	-8.98545	-7.66728
	65.5	-7.18127	-6.10754	-9.80107		65.5	-10.2217	-10.8274	-10.9596		65.5	-11.5141	-10.4451	-7.59565		65.5	-8.67956	-9.38269	-7.75189		65.5	-10.4015	-9.9178	-9.19665		65.5	-7.69672	-9.19863	-7.91412
	66.5	-7.09462	-6.04845	-9.8639		66.5	-10.4797	-10.9064	-11.2202		66.5	-11.1538	-10.3322	-7.16405		66.5	-7.93728	-9.47896	-8.05497		66.5	-10.0083	-10.5762	-9.48266		66.5	-7.71068	-9.23201	-8.27407
	67.5	-7.00704	-5.9385	-9.80973		67.5	-10.3274	-10.9499	-11.2095		67.5	-11.4415	-10.4267	-7.10033		67.5	-8.58161	-9.53668	-8.19791		67.5	-10.5867	-10.4	-8.83955		67.5	-7.84929	-9.38805	-7.8987
	68.5	-7.02188	-6.0607	-9.96745		68.5	-10.465	-11.2565	-11.2514		68.5	-11.366	-10.7865	-7.28498		68.5	-8.4106	-9.44473	-8.02299		68.5	-10.775	-10.8526	-9.62703		68.5	-7.98557	-9.22351	-8.23417
	69.5	-7.25541	-6.1375	-10.0189		69.5	-10.3018	-10.9822	-11.2186		69.5	-11.0693	-10.589	-7.18627		69.5	-8.61061	-9.62866	-8.14443		69.5	-11.0231	-11.1048	-9.51463		69.5	-8.01417	-9.28368	-8.02771
	70.5	-7.21639	-6.22255	-9.95682		70.5	-10.8294	-11.0492	-11.4167		70.5	-11.4653	-10.6219	-7.30379		70.5	-8.96253	-9.79801	-8.67996		70.5	-10.9006	-10.8438	-9.70934		70.5	-7.67947	-9.51194	-8.12224
	71.5	-7.22499	-5.94936	-9.95178		71.5	-10.3872	-11.3155	-11.0777		71.5	-11.6151	-10.7067	-7.32544		71.5	-8.63273	-9.96129	-8.60642		71.5	-11.101	-10.7553	-9.91358		71.5	-7.95082	-9.25586	-8.35866
	72.5	-7.22561	-6.19063	-9.95606		72.5	-10.7675	-11.0863	-11.3831		72.5	-11.4264	-10.6434	-7.25563		72.5	-8.47355	-9.8911	-8.39469		72.5	-11.0552	-11.1594	-9.80863		72.5	-7.9063	-9.67485	-8.25299
	73.5	-7.16854	-6.31269	-9.96959		73.5	-10.6413	-11.2322	-11.3787		73.5	-11.7211	-10.6794	-7.46449		73.5	-8.83453	-10.1103	-8.61515		73.5	-11.3542	-11.1481	-10.2251		73.5	-8.05523	-9.24705	-8.41908
	74.5	-7.21192	-6.19999	-9.80656		74.5	-10.9028	-11.4794	-12.0141		74.5	-11.4248	-10.6607	-7.60766		74.5	-8.88432	-10.236	-8.55767		74.5	-10.9341	-11.5469	-10.1307		74.5	-7.99813	-9.80165	-8.43401
	75.5	-7.26855	-6.30939	-9.93068		75.5	-10.9482	-11.496	-11.9008		75.5	-11.8964	-10.8354	-7.37459		75.5	-9.12542	-10.0445	-8.59332		75.5	-11.2545	-11.4777	-10.1582		75.5	-8.44603	-9.47538	-8.4888
	76.5	-7.15768	-6.37812	-9.87969		76.5	-11.1499	-11.8076	-12.2658		76.5	-12.2302	-10.974	-7.71556		76.5	-9.08927	-10.6769	-8.84034		76.5	-11.4278	-11.5663	-10.2537		76.5	-8.07351	-9.87719	-9.05556
	77.5	-7.05943	-6.36408	-10.13		77.5	-11.2833	-11.8776	-12.3133		77.5	-12.2821	-11.0818	-7.71747		77.5	-9.15605	-10.3987	-8.50879		77.5	-11.4107	-11.3056	-10.0764		77.5	-8.17502	-9.80794	-8.47614
	78.5	-7.5312	-6.55609	-9.82969		78.5	-11.5805	-12.1856	-12.9032		78.5	-12.3941	-11.0816	-7.79673		78.5	-9.07353	-10.6751	-8.82273		78.5	-11.5569	-11.7325	-9.98008		78.5	-8.20821	-10.2025	-8.81696
	79.5	-7.49362	-6.76078	-9.90884		79.5	-11.8216	-12.6431	-13.1376		79.5	-12.5579	-11.5771	-8.1261		79.5	-9.16278	-10.6747	-9.06045		79.5	-11.5734	-11.1018	-10.2961		79.5	-8.25454	-10.0386	-8.7407
	80.5	-7.36091	-6.84346	-10.1474		80.5	-12.2756	-12.7075	-13.5664		80.5	-12.7162	-11.7494	-8.21228		80.5	-9.48577	-10.7031	-8.67135		80.5	-11.6109	-11.5103	-10.5404		80.5	-8.38619	-9.90145	-8.68849
	81.5	-7.70115	-6.91954	-10.0069		81.5	-12.729	-13.1113	-13.8039		81.5	-12.9947	-12.0516	-8.63647		81.5	-9.27606	-10.6286	-8.94819		81.5	-11.6555	-11.8263	-10.5272		81.5	-8.6016	-10.3429	-8.57436
	82.5	-7.56009	-7.16388	-10.1124		82.5	-13.4718	-13.3289	-14.2062		82.5	-13.4502	-12.1689	-8.86305		82.5	-9.34751	-11.0588	-8.92048		82.5	-11.3848	-11.5805	-10.7392		82.5	-8.34028	-10.1558	-8.66745
	83.5	-7.80272	-7.43813	-10.1726		83.5	-13.5671	-13.9304	-14.3946		83.5	-13.3793	-12.644	-8.99012		83.5	-9.17563	-10.9508	-8.99959		83.5	-11.8799	-11.9478	-10.1916		83.5	-8.42485	-10.2009	-8.58419
	84.5	-8.04959	-7.49048	-10.0178		84.5	-13.9309	-14.4618	-15.0722		84.5	-13.7478	-12.8717	-9.14594		84.5	-9.109	-10.9961	-8.78069		84.5	-11.6344	-11.6394	-10.4554		84.5	-8.56856	-10.1035	-8.62537
	85.5	-8.19981	-7.86597	-10.0233		85.5	-14.7038	-14.7909	-15.3273		85.5	-14.2459	-13.0593	-9.37684		85.5	-9.65518	-11.2447	-9.30029		85.5	-11.8068	-11.4268	-10.7459		85.5	-8.48872	-9.91165	-8.92769
	86.5	-8.32733	-7.65719	-10.4708		86.5	-14.8368	-15.4058	-16.261		86.5	-14.3887	-13.3071	-9.74079		86.5	-9.2038	-11.3574	-8.95608		86.5	-11.723	-11.8429	-10.4812		86.5	-8.58413	-10.0504	-8.88485
	87.5	-8.61769	-8.22625	-10.2519		87.5	-15.5619	-16.1829	-16.711		87.5	-14.9522	-13.8133	-9.90317		87.5	-9.36043	-11.8609	-9.2933		87.5	-11.491	-11.9832	-10.2508		87.5	-8.39089	-10.038	-8.4107
	88.5	-8.68928	-8.52702	-10.6751		88.5	-16.4195	-16.9632	-17.3901		88.5	-15.4108	-13.8362	-10.0657		88.5	-9.90468	-12.089	-9.3664		88.5	-11.9265	-11.6754	-10.6921		88.5	-8.58046	-10.0024	-8.98728
	89.5	-8.9369	-8.79125	-10.5465		89.5	-17.0841	-17.4457	-17.6957		89.5	-15.9048	-14.4657	-10.4417		89.5	-9.53743	-12.205	-9.12247		89.5	-11.7568	-11.8884	-10.1395		89.5	-8.38026	-10.0691	-8.41566
	90.5	-8.93327	-9.0071	-10.8408		90.5	-17.3108	-17.5789	-17.8608		90.5	-16.2945	-15.1711	-10.8279		90.5	-9.49189	-12.558	-9.20111		90.5	-11.4399	-11.8318	-10.4264		90.5	-8.57467	-9.95157	-8.38232
	91.5	-9.13994	-9.16973	-10.7285		91.5	-17.2692	-17.5848	-17.9305		91.5	-16.7597	-15.5359	-10.8543		91.5	-9.49019	-13.109	-9.28099		91.5	-11.8052	-12.0139	-10.4075		91.5	-8.68891	-10.4942	-8.38918
	92.5	-9.45316	-9.29905	-10.884		92.5	-17.2877	-17.5728	-18.1352		92.5	-16.2455	-15.6519	-11.2956		92.5	-9.69071	-12.6812	-9.40992		92.5	-10.939	-11.6053	-10.7066		92.5	-8.43421	-9.80163	-8.63782
	93.5	-9.73866	-9.50377	-11.2579		93.5	-17.5308	-18.071	-18.1709		93.5	-16.7016	-16.2252	-10.9227		93.5	-9.3953	-13.0752	-9.26787		93.5	-11.5295	-11.4953	-10.4029		93.5	-8.81105	-9.94738	-8.49553
	94.5	-10.2228	-9.44814	-11.3024		94.5	-17.5201	-17.8125	-18.1765		94.5	-16.6748	-15.9609	-10.9354		94.5	-9.59401	-13.2342	-9.48821		94.5	-11.5647	-11.8906	-10.5312		94.5	-8.70521	-10.1473	-8.74648
