# Supplementary material for: Canine SOD1 harboring E40K or T18S mutations promotes protein aggregation without reducing the global structural stability
Source: PeerJ. 2020 Jul 15;8:e9512. doi: 10.7717/peerj.9512 (PMC7368427; doi:10.7717/peerj.9512)
Supplement: Supplemental Information 4 [file peerj-08-9512-s004.xlsx]

## Sheet: Sheet1
Cm_CD_Wavelength
	apo-SOD1 WT					apo-SOD1 E40K					apo-SOD1 T18S					holo-SOD1 WT					holo-SOD1 E40K					holo-SOD1 T18S
	220 nm					220 nm					220 nm					220 nm					220 nm					220 nm
Gdn-HCl (M)	wavelength				Gdn-HCl (M)	wavelength				Gdn-HCl (M)	wavelength				Gdn-HCl (M)	wavelength				Gdn-HCl (M)	wavelength				Gdn-HCl (M)	wavelength
0	-4.68637	-4.69141	-7.91024		0	-8.50407	-7.27656	-7.77297		0	-6.01303	-5.49741	-4.4687		0	-4.59333	-4.9567	-7.71554		0	-6.0138	-5.72327	-6.64882		0	-4.69466	-7.18996	-6.59723
0.5	-5.78232	-7.13614	-10.9515		0.5	-9.06409	-9.77461	-9.07773		0.5	-5.32554	-6.22639	-4.87538		0.5	-4.65848	-5.20753	-6.58017		0.5	-6.30405	-6.5034	-5.90596		0.5	-4.40134	-6.92288	-7.48665
1	-4.01779	-5.30207	-7.70472		1	-6.19665	-5.94569	-7.32428		1	-4.314	-5.40653	-3.62087		1	-4.28237	-5.0117	-7.79017		1	-6.55853	-6.4178	-6.61519		1	-4.57738	-7.66406	-8.24496
1.5	-4.54106	-4.33076	-7.30316		1.5	-5.94437	-5.68562	-5.99131		1.5	-4.52155	-4.4279	-3.5541		1.5	-4.70338	-4.9373	-7.61807		1.5	-7.12303	-6.39358	-5.87024		1.5	-5.2885	-6.87244	-7.15141
2	-3.06409	-4.57618	-6.53904		2	-5.66796	-4.74304	-5.62886		2	-4.29759	-4.61476	-3.21844		2	-3.7885	-4.97797	-6.68902		2	-5.93801	-6.1142	-6.1296		2	-5.21908	-7.20969	-6.82424
2.5	-3.86233	-4.2222	-5.90119		2.5	-5.36653	-4.61791	-5.43562		2.5	-3.71399	-3.84853	-2.30542		2.5	-3.70339	-4.99299	-6.7678		2.5	-6.69388	-6.69388	-5.35342		2.5	-4.85552	-6.95139	-6.9428
3	-2.75209	-3.94508	-5.58681		3	-5.17272	-4.11001	-5.85015		3	-3.62678	-4.1661	-2.63915		3	-3.26267	-4.24658	-7.04424		3	-5.61071	-6.11231	-5.30643		3	-4.02661	-6.03177	-6.43467
3.5	-3.90898	-3.90494	-5.71614		3.5	-4.5985	-3.51926	-4.93322		3.5	-4.20655	-4.32187	-3.135		3.5	-2.98395	-3.76189	-6.99157		3.5	-6.14819	-6.10772	-5.3104		3.5	-4.50655	-5.83331	-6.06123
4	-3.77513	-3.66662	-5.29622		4	-4.93802	-3.00645	-5.13454		4	-3.43951	-3.01632	-2.20711		4	-2.69416	-3.9038	-6.88239		4	-4.87153	-4.84582	-5.11086		4	-3.60439	-5.64227	-5.82426
4.5	-3.7679	-4.26661	-4.74998		4.5	-4.07828	-2.60826	-4.66838		4.5	-3.8592	-3.56042	-2.25335		4.5	-2.97279	-3.40497	-6.8953		4.5	-4.8253	-0.154764	-5.07327		4.5	-3.47704	-4.09603	-3.83059
5	-3.3655	-3.40773	-5.21312		5	-4.09359	-3.10459	-4.0786		5	-2.85659	-3.01897	-2.73963		5	-2.91289	-3.58796	-5.87404		5	-3.68183	-4.46196	-4.05392		5	-2.9423	-2.89487	-2.53337
5.5	-2.99198	-3.90592	-4.40417		5.5	-3.64992	-2.60274	-4.21172		5.5	-2.84149	-2.6458	-2.57585		5.5	-2.67783	-3.21023	-4.15857		5.5	-3.68169	-4.11263	-3.76488		5.5	-2.57676	-2.7734	-2.65777
6	-2.93539	-3.99613	-4.89842		6	-4.53267	-2.51602	-3.89818		6	-3.15926	-3.0681	-1.92679		6	-2.50046	-2.75653	-3.47527		6	-3.64764	-3.09002	-3.77345		6	-2.55224	-2.25101	-2.50123
